# Supplementary material for: HaploBlocker: Creation of subgroup specific haplotype blocks and libraries
Source: bioRxiv preprint, doi:10.1101/339788, version 2 (2019-03-19)
Supplement: Supplemental Table 2 [file 339788_file09.csv]

Window size	Number of Blocks	Average block length (# of SNPs)	Haplotypes per Block	Used MCMB
5	682	2020	138	2344
10	646	2157	125.5	2500
20	537	2440	119.1	3750
50	474	2615	101.4	5000
