# Supplementary material for: HaploBlocker: Creation of subgroup specific haplotype blocks and libraries
Source: bioRxiv preprint, doi:10.1101/339788, version 2 (2019-03-19)
Supplement: Supplemental Table 4 [file 339788_file11.csv]

t	Number of Blocks	Average block length (# of SNPs)	Haplotypes per Block	Used MCMB
1	537	2440	119.1	3750
0.95	642	5484	91.8	4375
0.9	763	9417	70.1	5313
0.8	848	11779	62.2	5625
0.6	852	12576	59	6485
